# Supplementary material
Source: publisher figshare collection journal article supplement (https://acs.figshare.com/ndownloader/files/32435975)
Supplement: Supplementary file 1 [file 32435975]

## **Supplementary Data**

**Efficient Preparation of a Non-enzymatic Nanoassembly based on Cobalt substituted Polyoxometalates (Co-POM) and Polyethylene imine (PEI) capped Silver Nanoparticles (AgNPs) for the Electrochemical Sensing of Carbofuran**

**Amna Yaqub<sup>a\*</sup>, Syeda Rubina Gilani<sup>a</sup>, Sehrish Bilal<sup>b</sup>, Akhtar Hayat<sup>b</sup>, Anila Asif<sup>b</sup>, Saadat Anwar Siddique<sup>b</sup>**

- a. University of Engineering and Technology, Lahore, 54000, Pakistan,
- b. Interdisciplinary Research Center in Biomedical Materials (IRCBM), COMSATS University, Islamabad, Lahore Campus, Lahore 54000, Pakistan

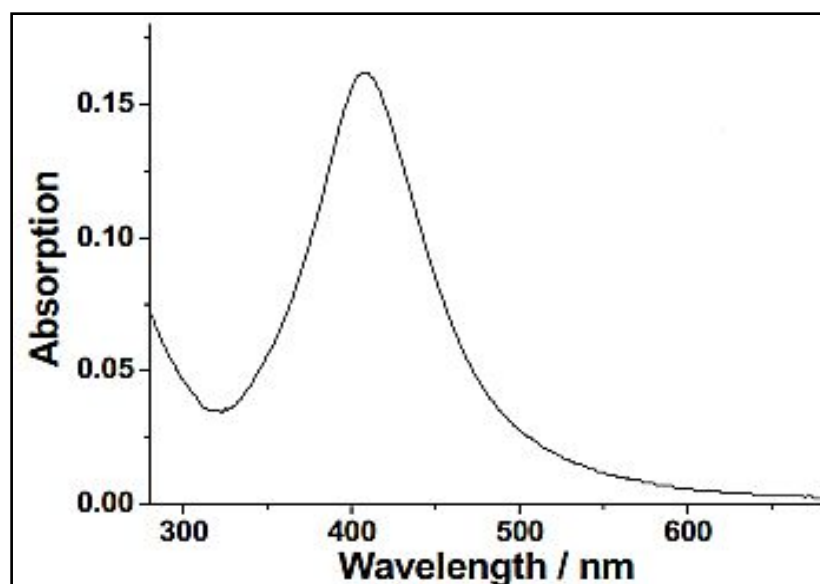

**Figure S1:** Typical UV-Visible spectrum of silver nanoparticles.

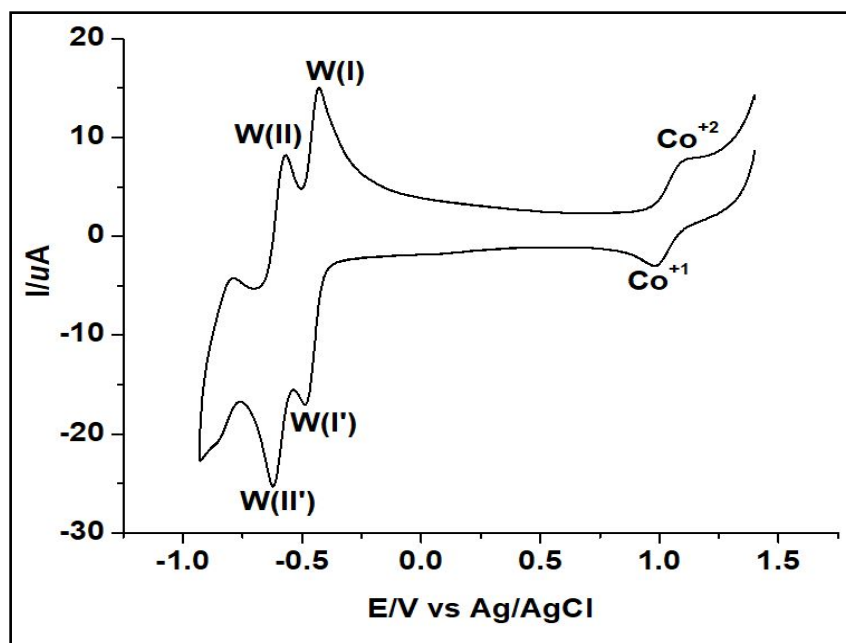

**Figure S2:** Solution phase cyclic voltammetry of cobalt substituted Dawson type polyoxometalate i.e.  $\text{K}_8\text{P}_2\text{W}_{17}\text{O}_{61}(\text{Co}^{2+}\cdot\text{OH}_2)\cdot 16\text{H}_2\text{O}$  in pH 4.5 buffer vs. Ag/AgCl (reference), Scan rate was 100  $\text{mVs}^{-1}$  at negative scan direction.

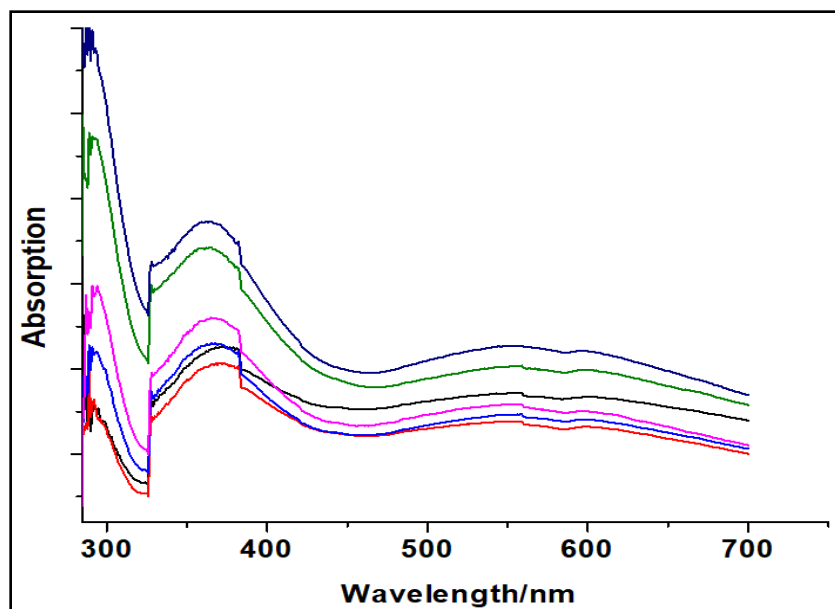

**Figure S3:** UV-Vis spectra of multilayer assembly based on PDDA/(POM/AgNPs) $n$  composition having  $n=6$  fabricated on ITO slide. The blank slide was used as a reference.

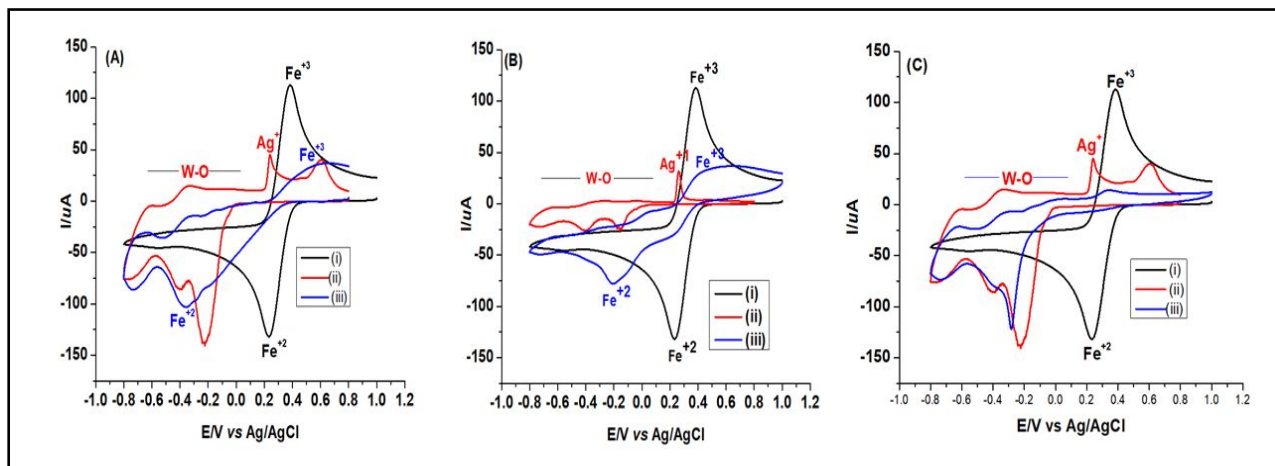

**Figure S4:** Permeability study: (A) Cyclic voltammograms recorded for (i) 1 mM  $[\text{Fe}(\text{CN})_6]^{3-}$  in buffer (0.1 M  $\text{Na}_2\text{SO}_4/\text{pH } 2.0$ ) at clean GCE before any deposition, (ii) Co-POM/AgNP multilayer nanoassembly comprising of 4 bilayers with outermost POM layer (anionic) in the same buffer, (iii) Co-POM/AgNP hybrid film in 1 mM  $[\text{Fe}(\text{CN})_6]^{3-}$  in pH 2.0 buffer. (B) Overlay of cyclic voltammograms of (i) 1 mM  $[\text{Fe}(\text{CN})_6]^{3-}$  in buffer (0.1 M  $\text{Na}_2\text{SO}_4/\text{pH } 2.0$ ) at clean GCE, (ii) Co-POM/AgNP multilayer film of 4 bilayers with outermost layer of cationic nanoparticles in the same buffer solution, (iii) Co-POM/AgNP hybrid film in of 1 mM  $[\text{Fe}(\text{CN})_6]^{3-}$  in pH 2.0 buffer. (C) Overlay of cyclic voltammograms of (i) 1 mM  $[\text{Fe}(\text{CN})_6]^{3-}$  in pH 2.0 buffer on clean GCE, (ii) Co-POM/AgNP hybrid film comprising 8 bilayers with outermost layer of anionic POM in pH 2.0 buffer, (iii) hybrid film in 1 mM  $[\text{Fe}(\text{CN})_6]^{3-}$  in pH 2.0 buffer (Scan rate was  $100 \text{ mVs}^{-1}$ ).

**Table S1:** Comparison of average recovery values of carbamate pesticide in real samples with the previously reported methods.

| Method                                                          | Sample   | Analysis time (min) | Concentrations (µg/kg) | Recoveries (%) | References |
|-----------------------------------------------------------------|----------|---------------------|------------------------|----------------|------------|
| Micellar electrokinetic chromatography tandem mass spectrometry | Tomatoes | >120                | 10                     | 81-99          | 1          |
| HPLC                                                            | Tomatoes | >180                | 10                     | -              | 2          |
| AChE/Con A/PDA-RGO-GNP/GCE                                      | Tomatoes | 15-20               | 10                     | 101            | 3          |
| HPLC-MS/MS                                                      | Tomatoes | 8                   | -                      | Avg.63         | 4          |
| HPLC/DAD                                                        | Tomatoes | 10                  | 30                     | 84.5-88.1      | 5          |
| icELISA                                                         | Mango    | >30                 | 10                     | 83.3           | 6          |
| UPLC-MS/MS                                                      | Mango    | >10                 | 10                     | 84.7           | 6          |
| LC/DAD                                                          | Tomatoes | 10                  | 60                     | 65.8           | 7          |
| PDDA/Co-POM/AGNP/GCE                                            | Tomatoes | <2                  | 10                     | 102            | This work  |

## References:

- 1: Moreno-Gonzalez, D., J. F. Huertas-Perez, A. M. Garcia-Campana, L. Gamiz-Gracia. Vortex-assisted surfactant-enhanced emulsification liquid–liquid microextraction for the determination of carbamates in juices by micellar electrokinetic chromatography tandem mass spectrometry. *Talanta* 2015, 139:174–80
- 2: Li, N., Chen J., Shi Y.P., Magnetic graphene solid-phase extraction for the determination of carbamate pesticides in tomatoes coupled with high performance liquid chromatography. *Talanta*, 2015, 141, 212–219.
- 3: Li Y., Li Y., Yu X., Sun Y., Electrochemical Determination of Carbofuran in Tomatoes by a Concanavalin A (Con A) Polydopamine (PDA)-Reduced Graphene Oxide (RGO)-Gold Nanoparticle (GNP) Glassy Carbon Electrode (GCE) with Immobilized Acetylcholinesterase (AChE), *Analytical Letters*, 2019, 14, 2283-2299.
- 4: Goto T., Ito Y, Oka H., Saito I., Matsumoto H., Sugiyama H., Ohkubo C., Nakazawa H., Nagase H., The high throughput analysis of N-methyl carbamate pesticides in wine and juice by electrospray ionization

liquid chromatography tandem massspectrometry with direct sample injection into a short column, Anal. Chim. Acta, 2005, 531, 79-86

5: Lin X.Y., Chen X.H., Huo X., Yu Z.G., Bi K.S., Li Q. Dispersive liquid–liquid microextraction coupled with high-performance liquid chromatography-diode array detection for the determination of *N*-methyl carbamate pesticides in vegetables, J. Sep. Sci., 2011, 34, 202-209.

6: Lan J., Wang M., Ding S., Fan Y, Diao X., Li Qing X., Zhao H., Simultaneous detection of carbofuran and 3-hydroxy-carbofuran in vegetables and fruits by broad-specific monoclonal antibody-based ELISA, Food Agric Immunol .2019, 30, 1085-1096.

7: Paíga P., Morais S., Correia M., Alves A., Matos C., Screening of Carbamates and Ureas in Fresh and Processed Tomato Samples using Microwave-Assisted Extraction and Liquid Chromatography, Anal. Lett., 2009, 42 265-283
